1  
2  
3  
4  
5  
6  
7  
8  
9  
10  
11  
12  
13  
14  
15  
16  
17  
18  
19  
20  
21  
22  
23  
24  
25

**In-silico studies of Riparin B in the design of drugs:** Physicochemical,  
pharmacokinetic and pharmacodynamic parameters

**In-silico studies of Riparin B in the design of drugs**

Aldenora Maria Ximenes Rodrigues<sup>1\*</sup>, Rayla Kelly Magalhães Costa<sup>2</sup>,  
Ranyelison Silva Machado<sup>1</sup>, Stanley Juan Chavez Gutierrez<sup>1</sup>, Francisco das  
Chagas Alves Lima<sup>2</sup>, Aldeídia Pereira de Oliveira<sup>1</sup>

*<sup>1</sup>Departament of Biophysical and Physiology, Federal University of Piaui,  
Terezina, Piauí, Brazil*

*<sup>2</sup>Departament of computational chemistry, State University of Piaui, Terezina,  
Piauí, Brazil*

\* Corresponding author

E-mail: [aldenora.amxr@gmail.com](mailto:aldenora.amxr@gmail.com) (AMXR)

## 26 **Abstract**

27

28 The process involved in the research, discovery and development of drugs is  
29 characterized by high extensive and complex cost linked to scientific and  
30 technological innovations, and it is necessary to study and verify the progress of  
31 research carried out in the field that results in patent applications. *Aniba riparia*  
32 (*Nees*) *Mez* is a plant species often used for therapeutic purposes, where its  
33 pharmacological properties are associated to the presence of alkaloids called  
34 riparins. 5 synthetic analog compounds (riparins A, B, C, D, E and F) were  
35 developed from natural riparins. These molecules, natural and synthetic, showed  
36 several pharmacological activities in tests performed *in vitro* and *in vivo*,  
37 highlighting the Central Nervous System (CNS). The objective of this work was  
38 to evaluate the physical-chemical, pharmacokinetic parameters (absorption,  
39 distribution, metabolism, excretion and toxicity) and pharmacodynamic  
40 parameters (bioactivity and adverse reactions) of Riparin B by means of *in silico*  
41 computational prediction. *Online software* such as *Pre-ADMET*, *SwissADME*,  
42 *Molinspiration* and *PASS on line* were used for the analysis. Riparin B fits the  
43 characteristics of *druglikeness*, pharmacokinetic properties appropriate to the  
44 predicted patterns and activities within the scope for the treatment of AD,  
45 demonstrating a possible potential in the inhibition of AChE. Therefore, *in silico*  
46 results allow us to conclude that riparin B is predicted to be a potential future drug  
47 candidate, especially via oral administration, due to its relevant Drug-likeness  
48 profile, bioavailability, excellent liposolubility and adequate pharmacokinetics,  
49 including at the level of CNS, penetrating the blood-brain barrier.

50

## 51 INTRODUCTION

52

53 The process involved in the research, discovery and development of drugs  
54 is characterized by high extensive and complex cost linked to scientific and  
55 technological innovations, and it is necessary to study and verify the progress of  
56 research carried out in the field that results in patent applications<sup>[1]</sup>.

57 Based on this principle, the pharmaceutical industry applies high  
58 investments in bioprospecting research, although it is aware that research on new  
59 drugs is a high-risk market. Thus, drug design strategies began to include  
60 molecular recognition studies in biological systems, assuming great importance,  
61 as they became fundamental bases for the understanding of properties such as  
62 potency, affinity and selectivity and structure-activity. And thus, the  
63 biotechnological tools associated with medicinal chemistry methods have gained  
64 a prominent role in the development of new molecules with biological activity<sup>[2]</sup>.

65 In order to avoid this failure, a set of ADME/Tox *in silico* filters was  
66 implemented in most pharmaceutical companies, aiming to discard substances,  
67 in the discovery phase, that are likely to fail later. This strategy tends to reduce  
68 the probability of failure, reducing time and resources used in research. And so,  
69 several softwares were developed that perform different analysis of molecules,  
70 inferring on the physicochemical, pharmacokinetic and pharmacodynamic  
71 parameters in the development stage<sup>[3,4]</sup>.

72 The species *Aniba riparia* is commonly used for medicinal purposes due  
73 to its pharmacological properties, attributed to alkaloids called riparins. Besides  
74 the natural molecules of this species, there are synthetic analogues known as  
75 riparins A, B, C, D and F, which share structures similar to natural molecules<sup>[5]</sup>.

76 Synthetic riparin analogues have already demonstrated antioxidant,  
77 including analysis of isolated mitochondria of the brain of mice<sup>[6,7]</sup>, antimicrobial<sup>[8]</sup>,  
78 antiparasitic<sup>[9]</sup>, as well as leishmanicide<sup>[10]</sup>, vasodilator<sup>[7]</sup> and anti-inflammatory<sup>[11]</sup>  
79 activities. Among the properties of synthetic riparins, their action in the Central  
80 Nervous System (CNS), such anxiolytic effects<sup>[12]</sup> in anxiety models, without  
81 affecting the locomotion of the animals used in the experiment<sup>[7]</sup>, which make  
82 them target molecules of new studies aimed at obtaining therapeutic alternatives,  
83 and can be used in the treatment of AD.

84 However, there is a significant problem that still remains in the drug  
85 discovery procedure, particularly in the later stages of conducting research: the  
86 analysis of the properties of ADME (absorption, distribution, metabolism and  
87 excretion) and the evident toxicity of drug candidates. Over 50% of drug  
88 candidates fail due to poor analysis of ADME/Tox during a drug design<sup>[2]</sup>.

89 To evaluate the physicochemical, pharmacokinetic (absorption,  
90 distribution, metabolism, excretion and toxicity) and pharmacodynamic  
91 (bioactivity and adverse reactions) parameters of the Riparin B by means of in  
92 silico computational prediction.

93

## 94 **MATERIALS AND METHODS**

95

96 This is an experimental, quali-quantitative research, aiming at the drug  
97 design by in silico analysis.

98 The design of the riparin B molecule was made through the *GaussView*  
99 6.0 *software*, the structural parameters calculated through the *Gaussian 09W*  
100 program and transformed into MDL Molfiles by *Chem3D*, for use in the *software*.

101 The computational prediction for riparin B was performed through the  
102 *online software: Pre-ADMET*<sup>®</sup> (<https://preadmet.bmdrc.kr/>), *SwissADME*<sup>®</sup>  
103 (<https://swissadme.ch>), *Molinspiration*<sup>®</sup> (<https://www.molinspiration.com/>), in  
104 order to obtain relative results of physicochemical parameters (lipophilicity (logP),  
105 molecular weight, polar surface area, number of hydrogen bond donors and  
106 acceptors, number of rotary bonds and solubility in water), drug-likeness profile,  
107 pharmacokinetic profile (absorption, distribution, metabolism, excretion and  
108 toxicity) of the molecule; and *PASS on line*  
109 (<http://www.pharmaexpert.ru/passonline/>), which allows to predict results  
110 regarding the bioactivity profile (pharmacodynamics) and adverse reactions of  
111 the molecule.

112 The ADMET profiles of Riparina B were analyzed in comparison with the  
113 properties range for 95% of known drugs and the values were calculated by the  
114 the referred software server.

115

## 116 **RESULTS**

117

118 Fig 1 shows the structural formula of the riparin B.

### 119 **Fig 1. Structural formula of the riparin B**

120 Table 1 presents the physicochemical parameters, lipophilicity and  
121 solubility of riparin B predicted by *Molinspiration, preADMET and SwissADME*  
122 *software*.

123 **Table 1 - Physicochemical parameters, lipophilicity and solubility of**

124 **riparin B**

| <b>Physicochemical properties</b>        |                                                 |
|------------------------------------------|-------------------------------------------------|
| Formula                                  | C <sub>17</sub> H <sub>19</sub> NO <sub>3</sub> |
| Molecular weight                         | 285,34 g/mol                                    |
| Number of atoms                          | 21                                              |
| Number of Arom. atoms.                   | 12                                              |
| Fraction Csp <sup>3</sup>                | 0,24                                            |
| No. of rotating bonds                    | 7                                               |
| No. H bond Acceptors                     | 3                                               |
| No. of H bond Donors                     | 1                                               |
| No. of O+N (HBA) bonds                   | 4                                               |
| No. of OH + NH (HBD) bonds               | 1                                               |
| Refractivity                             | 81,72                                           |
| TPSA (Topological polar surface area)    | 47,56 Å <sup>2</sup>                            |
| <b>Lipophilicity</b>                     |                                                 |
| P / w log ( <i>i</i> LOGP)               | 2,54                                            |
| P / w log ( <i>X</i> LOGP <sub>3</sub> ) | 2,68                                            |
| P / w log ( <i>W</i> LOGP)               | 2,68                                            |
| P / w log ( <i>M</i> LOGP)               | 2,56                                            |
| Log P / w ( <i>SILICOS-IT</i> )          | 3,41                                            |
| Overall average of the 5 predictions     | 2,77                                            |
| <b>Solubility in water</b>               |                                                 |
| Log S ( <i>ESOL</i> )                    | -3,26                                           |
| Solubility                               | 1,57e-01 mg/mL; 5,52e-04 mol/L<br>Soluble       |

|                             |                                |
|-----------------------------|--------------------------------|
| Log S ( <i>Ali</i> )        | -3,33                          |
| Solubility                  | 1,33e-01 mg/mL; 4,67e-04 mol/L |
|                             | Soluble                        |
| Log S ( <i>SILICOS-IT</i> ) | -5,97                          |
| Solubility                  | 3,02e-04 mg/mL; 1,06e-06 mol/L |
|                             | Moderately soluble             |

125 Legend: HBD - *Hydrogen Bond Donor*; HBA - *Hydrogen Bond Acceptor*.

126

127 Fig 2 is a diagram predicted by the *SwissADME* software which  
128 corresponds to the appropriate profile of the oral bioavailability of a drug.

129 **Figure 2 - Oral bioavailability diagram (radar).** Legend: LIPO - lipophilicity;  
130 SIZE - size; POLAR - polarity; INSOLU -insolubility; INSATU - unsaturations;  
131 FLEX - flexibility. The colored zone is the appropriate physical-chemical space for  
132 oral bioavailability.

133 Table 2 shows the *drug-likeness* profile predictions provided by the  
134 preADMET and SwissADME software.

135

**Table 2 - Drug-likeness profile**

| Similarity to drugs |                  |
|---------------------|------------------|
| <i>Lipinski</i>     | Yes; 0 violation |
| <i>Ghose</i>        | Yes; 0 violation |
| <i>Veber</i>        | Yes              |
| <i>Egan</i>         | Yes              |
| <i>Muegge</i>       | Yes              |
| <i>Lead rule</i>    | Yes; 0 violation |
| MDDR                | No; 1 violation  |

|                          |                  |
|--------------------------|------------------|
| WDI Rule                 | Yes; 0 violation |
| Bioavailability score    | 85%              |
| <b>Medical Chemistry</b> |                  |
| PANS                     | 0 alert          |
| Brenk                    | 0 alert          |
| Synthetic accessibility  | 1,86             |

136 Legend: MDDR - MDL *Drug Data Report*; WDI - *World Drug Index*; PAINS - *Pan Assay*  
137 *Interference Structures*.

138 Table 3 shows the results related to the pharmacokinetic profile analyzed  
139 by the preADMET and SwissADME software.

140 **Table 3 - Pharmacokinetic profile of riparin B**

| Pharmacokinetic profile     | SwissADME | preADMET |
|-----------------------------|-----------|----------|
| Gastrointestinal absorption | Top       | 95,44827 |
| Permeant BBB                | Yes       | 0.215854 |
| Glycoprotein substrate P    | No        | -        |
| P-Glycoprotein inhibitor    | -         | Yes      |
| CYP1A2 Inhibitor            | Yes       | -        |
| CYP2C19 Inhibitor           | Yes       | No       |
| CYP2C9 Inhibitor            | No        | No       |
| CYP2D6 Inhibitor            | Yes       | No       |
| CYP2D6 substrate            | -         | No       |
| CYP3A4 Inhibitor            | No        | Yes      |
| CYP3A4 substrate            | -         | Weak     |



|                          |            |           |
|--------------------------|------------|-----------|
| Log Kp (skin permeation) | -6.14 cm/s | -2,91864  |
| MDCK cells               | -          | 27,5014   |
| Plasma protein binding   | Top        | 83,641198 |
| CaCO-2 cell permeability | -          | 48,0741   |

141 Legend: BBB - *blood brain barrier*, blood-brain barrier; CYP - Cytochrome P450; MDCK  
142 - *Madin-Darby Canine Kidney*).

143

144

145 In table 4 there is a brief prediction of toxicity of the molecule by  
146 preADMET.

147

**Table 4 - Toxicity prediction of riparin B by preADMET**

| Toxicity                    |             |
|-----------------------------|-------------|
| Ames Test                   | Mutagenic   |
| <i>S. typhimurium</i> TA100 | Positive    |
| <i>S. typhimurium</i> TA135 | Positive    |
| Carcinogenic in mice        | Positive    |
| Carcinogenic in rats        | Negative    |
| Inhibition of hERG          | Medium risk |

148

Legend: hERG - *human Ether-à-go-go-Related Gene*

Bioactivity score of the Rip B

|                                  |       |
|----------------------------------|-------|
| Binding to GPCR                  | -0.03 |
| Ionic channel modulation         | -0.14 |
| Protein kinase/kinase inhibition | -0.13 |
| Connection to nuclear receivers  | -0.29 |
| Protease inhibition              | -0.12 |
| Enzyme Inhibition                | -0.09 |

149

150 Table 5 has information regarding the bioactivity score provided by the  
151 *Molinspiration software*.

152 **Table 5 - Bioactivity Score of riparin B**

153 Legend: GPCR - Protein Coupled Receivers G.

154 Table 6 shows the results of the probable pharmacological activities of  
155 riparin B in the CNS, predicted by the *software PASS on line*.

156

157

158 **Table 6 - Predicted pharmacological activities of riparin B**

| <b>Pa</b> | <b>Pi</b> | <b>Pharmacological activity</b>       |
|-----------|-----------|---------------------------------------|
| 0,876     | 0,010     | Treatment of phobic disorders         |
| 0,456     | 0,005     | Dopamine release stimulant            |
| 0,443     | 0,049     | 5-hydroxytryptamine release inhibitor |
| 0,341     | 0,058     | anti-amyloidogenic                    |
| 0,281     | 0,006     | Treatment of Huntington's disease     |
| 0,299     | 0,068     | Antineurogenic pain                   |
| 0,333     | 0,105     | Treatment of dementia                 |
| 0,268     | 0,082     | Treatment of opiate dependence        |

|       |       |                                                             |
|-------|-------|-------------------------------------------------------------|
| 0,184 | 0,005 | Acetylcholine release stimulant                             |
| 0,185 | 0,019 | D2S dopamine antagonist                                     |
| 0,188 | 0,023 | MAO Inhibitor                                               |
| 0,275 | 0,116 | Acetylcholinesterase inhibitor                              |
| 0,279 | 0,132 | N-acetylneuraminate 7-O(or 9-O)-acetyltransferase inhibitor |
| 0,158 | 0,041 | Neuropeptide agonist                                        |
| 0,156 | 0,049 | Acetyl-CoA C-acyltransferase Inhibitor                      |
| 0,297 | 0,212 | Neurotransmitter uptake inhibitor                           |
| 0,113 | 0,053 | Beta amyloid aggregation inhibitor                          |
| 0,078 | 0,025 | Butilcolinesterase Inhibitor                                |
| 0,119 | 0,067 | Neuropsin inhibitor                                         |
| 0,090 | 0,049 | Adrenergics                                                 |
| 0,137 | 0,097 | Beta-amyloid protein antagonist                             |
| 0,196 | 0,168 | Antiparkinsonian                                            |

159 Key: Pa – Probability to be active; Pi – probability to be inactive.

160 While table 7 predicts the possible and best targets of riparin B provided  
 161 by *SwissADME software*.

162 **Table 7 - Prediction of riparin B targets, according to SwissADME**

| Target               | Common Name | Target Class |
|----------------------|-------------|--------------|
| Acetylcholinesterase | AChE        | Hydrolase    |

|                                                                  |                        |                                      |
|------------------------------------------------------------------|------------------------|--------------------------------------|
| Delta opioid receptor                                            | OPRD1                  | Family A G-protein coupled receptors |
| Dopamine D1, D2 and D3 receptor                                  | DRD1, DRD2 and DRD3    | Family A G-protein coupled receptors |
| Kappa opioid receptor                                            | OPRK1                  | Family A G-protein coupled receptors |
| GRM4 glutamate metabotropic receptor 1 and 4                     | GRM1 and GRM4          | Family C G-protein coupled receptors |
| Monoamine oxidase A                                              | MAOA                   | Family C G-protein coupled receptors |
| Serotonin 2a (5-HT2a), 2b (5-HT2b) and 2c (5-HT2c) receptor      | HTR2A, HTR2B and HTR2C | Family A G-protein coupled receptors |
| Transient receptor potential cation channel subfamily A member 1 | TRPA1                  | Voltage Dependent Ion Channel        |
| Vanilloid receptor                                               | TRPV1                  | Voltage Dependent Ion Channel        |

163 Table 8 presents the results of possible adverse reactions of riparin B also  
 164 predicted by the PASS online software.

165

166

**Table 8 - Main expected adverse reactions of riparin B**

| Pa    | Pi    | Adverse reactions                |
|-------|-------|----------------------------------|
| 0,908 | 0,004 | Galactorrhea                     |
| 0,861 | 0,008 | Orthostatic postural hypotension |

|       |       |                           |
|-------|-------|---------------------------|
| 0,771 | 0,004 | Palpitation               |
| 0,773 | 0,007 | Hypercholesterolemia      |
| 0,781 | 0,045 | Tremors                   |
| 0,750 | 0,017 | Hyperglycemia             |
| 0,746 | 0,018 | Hypotonia                 |
| 0,704 | 0,024 | Gastrointestinal bleeding |
| 0,711 | 0,037 | Atrial fibrillation       |

167 Key: Pa – Probability to be active; Pi – Probability to be inactive.

168

## 169 **DISCUSSION / CONCLUSION**

170 The use of in-silico models has been recognized in recent decades as  
171 being of fundamental importance in the area of research and development of  
172 drugs (R&D), due to its applications both in the evaluation of bioactive substances  
173 and in relation to their physicochemical and pharmacokinetic properties, giving  
174 rise to a new model of drug design with greater effectiveness and efficiency<sup>[13]</sup>.

175 Several pharmaceutical companies in different countries conduct their  
176 research related to ADME/Tox (Absorption, Distribution, Metabolism,  
177 Excretion/Toxicity) more efficiently through the introduction of combinatorial  
178 chemical technology, which allows the synthesis and screening of numerous  
179 compounds in the same time interval. This is only possible due to virtual  
180 screening (prediction systems), built by different programming languages forming  
181 databases with already known experimental data, allowing the screening of drug  
182 candidates, using the very drugs that have been approved and are already on  
183 the market<sup>[14]</sup>.

184           With the use of ADME/Tox prediction systems, it became easier to predict  
185   the action and behavior of numerous bioactive molecules that could become a  
186   drug, as a result this led to a better screening process of substances for research  
187   involving more advanced experimentation, reducing costs and time in drug  
188   development. In addition, in these screening systems it is possible to predict  
189   numerous failures that arise in the development of new drugs, sometimes  
190   foreseen in more advanced stages, such as clinics<sup>[15,16]</sup>.

191           Combinatorial chemistry has become gold in the pharmaceutical industry,  
192   since bioassays are guided by structural evaluation, observing structural  
193   similarities and/or interaction between new compounds, from the English *New*  
194   *Chemical Entity* (NCE) and receptors, as such revolutionizing the search for  
195   bioactive ingredients<sup>[17,18]</sup>.

196           Among all the parameters evaluated in this article, the discussion begins  
197   with explanations of the physicochemical properties of riparin B (fig. 1), presented  
198   in table 1. The search for understanding the physicochemical properties of small  
199   molecules has greatly increased. The understanding of these properties is  
200   necessary in the design of new pharmacological compounds with the ability to  
201   bind to various biological targets and present beneficial effects to the body,  
202   leading to the discovery of new treatments for diseases of more complex origin,  
203   such as Alzheimer's disease<sup>[19]</sup>.

204           Some properties such as electronic distribution, size of the molecule,  
205   hydrophobicity, binding characteristics, presence of groups responsible for the  
206   biological activity of the molecule and flexibility are major influencers and with the  
207   ability to modulate the behavior of the molecule in a biological organism, including

208 transport properties, bioavailability, affinity for proteins, metabolic stability,  
209 toxicity, among others<sup>[20]</sup>.

210 One of the physicochemical properties essential in the search for new  
211 drugs is the molecular weight (PM), which can be a great differential in relation to  
212 intracellular processes, such as intestinal absorption, penetration in the blood-  
213 brain barrier (BHE), elimination rate and interaction with molecular targets<sup>[21]</sup>. The  
214 analyzed molecule, riparin B, showed molecular weight with acceptable variability  
215 by all in silico filters provided by the *software*.

216 Another physicochemical characteristic of great importance obtained was  
217 with respect to the acid-base character of the molecule, determined by the ability  
218 to accept and donate protons H<sup>+</sup><sup>[22]</sup>. Lipinski *et al.* <sup>[23]</sup> inferred that molecules that  
219 exhibit a lower number of hydrogen bond donor atoms - sum of *hydrogen bond*  
220 *donor atoms* O-H and N-H (HBD) and a higher number of hydrogen bond  
221 *acceptor atoms* - sum of *hydrogen bond acceptor atoms* O and N (HBA) have the  
222 most favorable ADME/Tox profile.

223 Ribparin B has shown to be an acceptor molecule, which infers that it has  
224 basic properties. This inference is of great relevance in relation to the  
225 pharmacokinetic process of absorption, more specifically possible absorption  
226 sites, since it is known that the main biological compartments have defined pH.

227 Among all the physicochemical properties of a micromolecule, the main  
228 ones capable of changing the pharmacotherapeutic profile are the ionization  
229 coefficient, expressed by pKa, which consists of the relative contribution of  
230 neutral and ionized species, already discussed, and the partition coefficient,  
231 expressed by the relation between hydro and liposolubility profile<sup>[22]</sup>.

232           Regarding the hydro and liposolubility profile of riparin B, it is possible to  
233 deduce that it is a liposoluble molecule with moderate water solubility (amphiphilic  
234 class), because the results obtained are within the variability accepted by different  
235 computational methods used.

236           Liposolubility (LogP) is a property of great significance and is used as an  
237 indicator of the oral bioavailability of drug candidate molecules, also constituting  
238 one of the main parameters of ADME/Tox<sup>[24]</sup>. In general, the optimization of the  
239 gastrointestinal absorption profile, through passive diffusion, after oral  
240 administration of a prototype candidate drug is achieved through the balance of  
241 its permeability and water solubility profile, known as Log P or Log D<sup>[25]</sup>.

242           Ribparin B presented an average of 2.77 for Log P, classified as optimal  
243 for good intestinal absorption, due to the balance between water solubility and  
244 the permeability rate by passive diffusion. Extreme values result in unbalance in  
245 these profiles, with capacity to negatively impact the oral bioavailability profile. In  
246 addition, the increase in lipophilicity values is involved in toxic properties such as  
247 blocking of CYP450 and hERG, as well as phospholipidosis induction<sup>[24,26,27]</sup>.

248           Thus, there is relevant evidence suggesting that controlling lipophilicity,  
249 among all the physical-chemical properties, within a defined ideal range,  
250 improves the quality of a molecule and, consequently, the probability of  
251 therapeutic success.

252           Besides LogP, the *software PreADMET* and *SwissADME* make available  
253 the TPSA of the molecule, often associated with the bonds that the structure is  
254 capable of making and which is also involved with modifications in oral  
255 permeability. This parameter is also used in association with the counting of



256 rotational bonds and allows the analysis of the molecular flexibility, acting on the  
257 Drug-likeness profile of the molecule<sup>[28]</sup>.

258         Considering that the great majority of the active drugs by oral route are  
259 passively absorbed, having transposed the lipidic layer that constitutes the  
260 hydrophobic environment of the biological membranes, fig. 2 highlights important  
261 physicochemical properties necessary for the drug to reach plasma  
262 concentrations capable of reproducing the biological effect evidenced in *in vitro*  
263 and *in vivo* experiments. In the diagram it is possible to see that the  
264 characteristics of riparin B occupy only the colored zone, which is the appropriate  
265 physicochemical space for oral bioavailability.

266         In this study it was also possible to evaluate the Drug-likeness profile (table  
267 2) of riparin B, through the physicochemical parameters of the molecule, such as  
268 PM, TPSA, HBA, HBD, Log P, number of atoms *in general* and aromatics atoms,  
269 fraction Csp<sup>3</sup>, number of rotative bonds and refractivity, in order to verify the  
270 similarity of riparin B with the other drugs already recognized and that are found  
271 in different *in silico* databases.

272         The best known rule that relates chemical structures to their biological  
273 activities is *Lipinski's rule of five* or "rule of five". It was developed to direct the  
274 choice of new drug candidate molecules and was also the pioneer in applying  
275 these rules to the drug-likeness profile of a given molecule with its  
276 physicochemical properties. According to this rule, for a given molecule to be  
277 permeable to cell membranes and also to have easy absorption by means of  
278 passive diffusion in the intestinal region, it needs to match the following  
279 parameters:  $\text{LogP} \leq 5$ ;  $\text{PM} \leq 500$ ;  $\text{HBA} \leq 10$  and  $\text{HBD} \leq 5$ <sup>[19,23]</sup>. And riparin B meets

280 all these requirements, without violation (Log P: 2.77; PM: 285.34; HBA: 4; HBD:  
281 1).

282 In silico screening software also provides other filters to prove the *Drug-*  
283 *likeness* profile. Among them, the *Ghose* filter ( $160 \leq PM \leq 480$ ;  $-0,4 \leq WLogP \leq 5,6$ ;  
284  $40 \leq \text{refractivity} \leq 130$ ;  $20 \leq n^{\circ} \text{ of atoms} \leq 70$ ), *Veber* (number of rotative bonds  $\leq 10$ ;  
285  $TPSA \leq 140$ ), *Egan* ( $WLogP \leq 5,88$ ;  $TPSA \leq 131,6$ ), *Muegge* ( $200 \leq PM \leq 600$ ; -  
286  $2 \leq XLogP \leq 5$ ;  $TPSA \leq 150$ ; number of aromatic rings  $\leq 7$ ; number of heteroatoms  $> 1$ ;  
287 number of rotative bonds  $\leq 15$ ;  $HBA \leq 10$  and  $HBD \leq 5$ ), *Lead* ( $250 \leq PM \leq 350$ ;  
288  $XLogP \leq 3,5$ ; number of rotative bonds  $\leq 7$ )<sup>[29]</sup> and displayed a qualified profile for  
289 a drug candidate.

290 There are also two Drug-likeness profile filters, (MDDR and WDI), made  
291 available by in-silico analysis from licensed databases that assign biological  
292 activities to drug-like compounds. The MDL Drug Data Report (MDDR), compiled  
293 from the patent literature, is a popular example. It contains several hundred  
294 distinct activities, some of which are therapeutic areas<sup>[31,32]</sup>. Concerning the  
295 MDDR filter, riparin violates a requirement, due to the presence of aromatic rings,  
296 and is considered as a possible medium profile drug. meanwhile for the WDI  
297 Rule, riparin does not violate rules and is similar to the drugs that belong to this  
298 database.

299 Drug-likeness is defined as a complex balance between various molecular  
300 properties and structure characteristics that determine whether a given molecule  
301 is similar to an oral medication with regards to bioavailability. These properties,  
302 especially hydrophobicity, electronic distribution, hydrogen binding  
303 characteristics, size and flexibility of the molecules and the presence of various  
304 pharmacophoric characteristics influence the behavior of the molecule in a living

305 organism, including bioavailability, transport properties, affinity with proteins,  
306 reactivity, toxicity, metabolism, stability. Finally, it interferes with the efficacy  
307 relative to the pharmacokinetic profile of a molecule [33].

308         Responding to a need demonstrated by scientists to predict permeability  
309 and bioavailability properties, Martin<sup>[34]</sup> has constructed a bioavailability score  
310 that seeks to predict the probability of a molecule having at least 10% oral  
311 bioavailability in rats or having measurable permeability in Caco-2 cells of 85%  
312 if the polar surface area (TPSA) is  $\leq 75\text{\AA}^2$ ; 56% if  $75 < \text{TPSA} < 150\text{\AA}^2$  and 11% if  
313 TPSA is  $\geq 150\text{\AA}^2$ . Riparin B showed an 85% probability due to TPSA value (47.56  
314  $\text{\AA}^2$ ).

315         The objective of the results of medicinal chemistry is to support the daily  
316 efforts in drug discovery. Thus, the *SwissADME software* presents two  
317 complementary filters (PAINS and Brenk) for pattern recognition that allow the  
318 identification of potentially problematic fragments in the studied molecules. If  
319 there is any type of mentioned fragment found in the molecule under evaluation,  
320 the software indicates with alerts<sup>[29]</sup>. Taking these criteria into consideration,  
321 riparin B does not have this type of fragment, since there was no alert type to be  
322 considered.

323         Pan-assay interference compounds (PAINS) are chemical fragments that  
324 generally give false-positive results, as they tend to react unspecifically with  
325 numerous biological targets, rather than specifically connecting to a desired  
326 target<sup>[35]</sup>. The structural alert indicated by *Brenk* is purely based on the knowledge  
327 of a compilation of chemical parts known to be toxic, chemically reactive,  
328 metabolically unstable or with properties responsible for poor  
329 pharmacokinetics<sup>[36]</sup>.

330           Regarding the value of synthetic accessibility, riparin B presented a score  
331 of 1.86, shown to be an easily synthesized molecule. This value is a score based  
332 on the fragmented analysis of structures of more than 13 million compounds with  
333 the hypothesis that the more a molecular fragment is frequent, the easier it is to  
334 obtain the molecule. The score is defined between 1 (easy synthesis) and 10  
335 (very difficult synthesis) <sup>[29]</sup>.

336           Regarding the pharmacokinetic parameters (table 3), we obtained data on  
337 absorption (gastrointestinal (HIA), skin permeation (Log Kp), model of Caco-2  
338 cells and MDCK cells), distribution (penetration of the blood-brain barrier and  
339 binding to plasma proteins), metabolism/biotransformation/excretion (substrate  
340 and cytochrome P450 inhibitor).

341           Among the numerous in vitro methods used in the drug selection process  
342 to evaluate the intestinal absorption of drug candidates, the Caco-2 (human  
343 adenocarcinoma colorectal cell culture) and MDCK (*Madin-Darby Canine Kidney*)  
344 cell models have been recommended as reliable for predicting the oral absorption  
345 of drugs. In addition, the HIA (*Human Intestinal Absorption*) in silico model and  
346 the skin permeability model can predict and identify potential drugs for oral and  
347 transdermal administration<sup>[37]</sup>.

348           Regarding these parameters, riparin B demonstrated high gastrointestinal  
349 absorption potential (GIA), which corroborates the basicity of the molecule and  
350 relevant skin permeation values, both by *preADMET* (-6.14 cm/s) and  
351 *SwissADME* (-2.91864) software.

352           Oral administered drugs are preferably developed, due to market,  
353 convenience and safety. After oral administration, the drug goes through different  
354 processes, among them: it is dissolved and solubilized in the gastrointestinal tract

355 so that it can be absorbed in the stomach or through the intestine. The latter,  
356 called human intestinal absorption is one of the most important for drugs that act  
357 through this route<sup>[38]</sup>. Thus, we can predict that riparin B has a significant potential  
358 to become an oral drug.

359 The prediction of the permeability coefficient (Kp) for the absorption of  
360 molecules by the epidermis of mammals is based on the linear model built by  
361 Potts and Guy<sup>[39]</sup>. Thus, the more negative the log Kp, the less the molecule  
362 permeates, for a example, diclofenac, good topical anti-inflammatory with a log  
363 Kp (-4.96 cm/s).

364 The results predicted by the Coco-2 (~48.0) and MDCK (~27.5) cell models  
365 also pointed out that riparin B fits as an average permeability molecule (20 ~ 70  
366 %), according to the category proposed by Yamashita and collaborators<sup>[40]</sup>.

367 Still regarding absorption, one of the results found in this study was that  
368 riparin B may act as a P-glycoprotein (P-gp) inhibitor and not as a substrate. This  
369 result fundamental to deduce about active efflux through biological membranes,  
370 since P-glycoprotein constitutes a class of efflux or secretion transporters that act  
371 as a barrier to absorption in numerous compartments, such as in the  
372 gastrointestinal membranes and lumen wall or in the membranes of the brain. An  
373 important role of P-gp is to protect the CNS from xenobiotics and if the molecule  
374 can act as an inhibitor, it reinforces the possibility of crossing the blood-brain  
375 barrier<sup>[41]</sup>.

376 Regarding distribution, the penetration of the blood-brain barrier can  
377 provide information on the therapeutic potential of the drug in the CNS and the  
378 model of binding to plasma proteins provides data on an effective distribution.  
379 According to the predicted results, riparin B has the ability to overcome the blood-

380 brain barrier (~0.21) and can be characterized as a substance with medium  
381 absorption (0.1-2.0) and binding power to plasma proteins (~83%), which can be  
382 considered a weakly bound chemical substance (less than 90%).

383 Predicting penetration into the blood-brain barrier means predicting that  
384 the molecule is able to pass through this barrier is crucial in the pharmaceutical  
385 sphere and in this study, since its main focus is the treatment of Alzheimer's  
386 disease<sup>[42]</sup>.

387 The part of the drug that becomes available for diffusion through the  
388 membranes, and for pharmacological interaction in the body is that which is not  
389 bound to plasma proteins, thus a high affinity for plasma proteins directly  
390 influences the pharmacological activity and biodistribution of this drug<sup>[37]</sup>.

391 Knowledge about the interaction of molecules with cytochrome P450  
392 (CYP) is also essential. This superfamily of isoenzymes participates in a  
393 fundamental way in the metabolism, biotransformation and elimination of drugs.  
394 It is estimated that 50 to 90% of therapeutic molecules can be substrates of the  
395 five major isoforms (CYP1A2, CYP2C19, CYP2C9, CYP2D6, CYP3A4) <sup>[43]</sup>.

396 Thus, it was possible to predict that riparin B proved to be a weak substrate  
397 of only the CYP3A4 isoform. Regarding the inhibition of the isoforms, the results  
398 of the *software* were contradictory, as *preADMET* reported that riparin B inhibits  
399 only the CYP3A4 isoform, whereas *SwissADME* predicted that the molecule  
400 inhibits the CYP1A2, CYP2C19 and CYP2D6 isoforms.

401 Inhibition of these isoenzymes is one of the main causes of drug  
402 interactions related to pharmacokinetics and may cause drug interactions, toxic  
403 effects or adverse effects due to less purification and accumulation of the drug or  
404 its metabolites in the body<sup>[43]</sup>.

405 Toxicity is one of the final parameters of the ADME/Tox analysis of the  
406 molecule in question. Considering the in silico toxicity exhibited by the *preADMET*  
407 *software*, riparin B displayed the following results (table 4): positive for the two  
408 strains of *S. typhimurium* used in the Ames test, implying it as mutagenic,  
409 negative for carcinogenicity in rats and positive for carcinogenicity in mice and  
410 showed medium risk of hERG inhibition(cardiotoxicity).

411 The *Ames* test is a simple method that detects mutagenicity of a substance  
412 by making use of various strains of *Salmonella typhimurium* bacteria that carry  
413 mutations in genes involved with histidine synthesis, the variable tested by the  
414 *software* is the ability of the mutagen to cause a reversal of growth in a histidine  
415 free medium<sup>[44]</sup>.

416 Computational modeling is often used to select new molecules for  
417 therapeutic purposes, based on the most relevant biological properties for  
418 pharmacological interaction. *Molinspiration software* provides bioactivity scores  
419 of molecules with respect to different cell receptors, such as ionic channels,  
420 GPCRs, enzymes, proteases, kinases and nuclear receptors<sup>[45,46]</sup>.

421 There is a ranking to be followed, where there is the inference that active  
422 substances are those that *score* >0, moderately active substances *score in the*  
423 *range of* -5.0 to 0 and inactive compounds *score* <-5.0<sup>[47, 48]</sup>. Through table 5, it  
424 was possible to predict that the riparin B molecule presents as a moderately  
425 active substance. It is important to mention the bioactivity of enzyme inhibition,  
426 important in the treatment of Alzheimer's disease, since AChE inhibitors  
427 constitute a class of treatment.

428 The results obtained through the *PASS online software* are based on the  
429 computational learning method, the English "*machine learning methods*", which

430 makes use of multilevel descriptors and Bayesian algorithm, with the ability to  
431 predict the activity and inactivity probabilities for more than 4000 biological  
432 activities from a complete analysis of the biologically active molecule structure-  
433 activity<sup>[49,50]</sup>.

434 Important predictions of the pharmacological potential of riparin B were  
435 observed in table 6, focusing on activities directly related to the CNS. To analyze  
436 the results, there is a score to be used: activity with higher probability of  
437 occurrence ( $P_a > 0.7$ ), probable probability of occurrence ( $0.5 < P_a < 0.7$ ) and  
438 unlikely probability of occurrence ( $P_a < 0.5$ ). Thus, it is predicted which  
439 pharmacological activities are very likely, probable or unlikely for molecules  
440 previously tested in *in vivo* experiments<sup>[51]</sup>.

441 The activities demonstrated that are related to Alzheimer's disease  
442 include: dementia treatment, acetylcholine release stimulant, anti-amyloidogenic,  
443 acetylcholinesterase inhibitor, butylcholinesterase inhibitor, Beta amyloid  
444 aggregation inhibitors and  $\beta$ -amyloid protein antagonist (Table 6).

445 In addition, the *SwissADME software* has listed possible targets for the  
446 riparin B molecule (table 7). Among them, it is worth mentioning the  
447 acetylcholinesterase, target of several drugs commonly used in the treatment of  
448 Alzheimer's disease.

449 Like almost all drugs, the prediction for riparin B inferred possible adverse  
450 reactions (table 8), with galactorrhea and orthostatic postural hypotension among  
451 the most likely adverse reactions. These reactions are likely to occur due to  
452 failures in the biotransformation process, specifically in the inactivation of drugs  
453 for subsequent excretion.





- 477 [3] Lee SK, Lee IH, Kim HJ, Chang GS, Chung JE, No KT. The PreADME  
478 Approach: Web-based program for rapid prediction of physico-chemical, drug  
479 absorption and drug-like properties. *EuroQSAR*. 2003;1:410-20.  
480
- 481 [4] Lee SK, Chang GS, Lee IH, Chung JE, Sung KY, No KT. The PreADME: pc-  
482 based program for batch prediction of adme properties. *EuroQSAR*. 2004;9:5-  
483 10.  
484
- 485 [5] Araújo ÉJFD, Lima LKF, Silva OA, Júnior LMR, Gutierrez SJC, Carvalho  
486 FADA, et al. In vitro antioxidant, antitumor and leishmanicidal activity of riparin  
487 A, an analog of the Amazon alkaloids from *Aniba riparia* (Lauraceae). *Acta*  
488 *Amaz*. 2016;46(3):309-14.  
489
- 490 [6] Nunes GBL, Policarpo PR, Costa LM, Silva TG, Militão GCG, Câmara CA, et  
491 al. In Vitro Antioxidant and Cytotoxic Activity of Some Synthetic Riparin-Derived  
492 Compounds. *Molec*. 2014;19:4595-607.  
493
- 494 [7] Nunes GBL, Costa LM, Gutierrez SJ, Satyal P, De Freitas RM. Behavioral  
495 tests and oxidative stress evaluation in mitochondria isolated from the brain and  
496 liver of mice treated with riparin A. *Life Sci*. 2015;121:57-64.  
497
- 498 [8] Costa LM, Macedo EV, Oliveira FAA, Ferreira JHL, Gutierrez SJC, Pelaez  
499 WJ, et al. Inhibition of the NorA efflux pump of *Staphylococcus aureus* by  
500 synthetic riparins. *J Appl Microbiol*. 2016;121:1312-22.  
501

502 [9] Mafud AC, Silva MPN, Nunes GBL, Oliveira MAR, Batista LF, Rubio TI, et al.  
503 Antiparasitic, structural, pharmacokinetic, and toxicological properties of riparin  
504 derivatives. *Toxicol In Vitro*. 2018;50:1-10.

505

506 [10] Figueiredo KA. Desenvolvimento tecnológico de uma microemulsão  
507 contendo riparina c para o tratamento da leishmaniose tegumentar: obtenção,  
508 caracterização e avaliação farmacológica. PhD Dissertations, Universidade  
509 Federal do Piauí. 2019.

510

511 [11] Santiago RF, Brito TV, Dias JM, Dias Jr GJ, Cruz Jr JS, Batista JA, et al.  
512 Riparin B, a Synthetic Compound Analogue of Riparin, Inhibits the Systemic  
513 Inflammatory Response and Oxidative Stress in Mice. *Inflam*. 2015;38(6):2203-  
514 15.

515

516 [12] Araújo CRM, Santos VLA, Guimarães DG, Gonsalves AA. The  
517 interdisciplinarity in drug Discovery. *J Anal Pharm Res*. 2018;7(2):222-4.

518

519 [13] Matos KS, Moda TL, Andricopulo AD. Estudos in silico da Permeabilidade  
520 em Células Caco-2. *Soc Bras Quim*. 2013;36:1.

521

522 [14] Montenegro CA. Bioprospecção dos efeitos tóxicos, antibacterianos e  
523 antioxidantes da flavona e de seus derivados hidroxilados. PhD Dissertations,  
524 Universidade Federal da Paraíba. 2015. Available from:  
525 <https://repositorio.ufpb.br/jspui/handle/tede/8825>

526

- 527 [15] Hansch C, Leo A, Mekapati SB, Kurup A. QSAR and ADME. *Bioorg Med*  
528 *Chem Lett.* 2004;12:3391-400.  
529
- 530 [16] Czodrowski P, Kriegl JM, Scheuerer S, Fox T. Computational approaches  
531 to predict drug metabolism. *Expert Opin Drug Metab Toxicol.* 2009;5:15-27.  
532
- 533 [17] Araújo EJJ, Rezende-Júnior LM, Lima LKF, Silva-Júnior MPD, Silva OA,  
534 Sousa Neto BP, et al. Pathophysiological investigations, anxiolytic effects and  
535 interaction of a semisynthetic riparin with benzodiazepine receptors. *Biomed*  
536 *Pharmacother.* 2018;103:973-81.  
537
- 538 [18] Montanari CA, Bolzani VS. Planejamento racional de fármacos baseado  
539 em produtos naturais. *Quím. Nov.* 2001;24(1):105-11.  
540
- 541 [19] Lagorce D, Douguet D, Miteva MA, Villoutreix B. O. Computational analysis  
542 of calculated physicochemical and ADMET properties of protein-protein  
543 interaction inhibitors. *Sci Rep.* 2017;7:46277.  
544
- 545 [20] Pihan E, Colliandre L, Guichou JF, Douguet D. e-Drug3D: 3D structure  
546 collections dedicated to drug repurposing and fragment-based drug design.  
547 *Bioinfo.* 2012;28(11):1540-1.  
548
- 549 [21] Gleeson MP, Hersey A, Montanari D, Overington J. Probing the links  
550 between in vitro potency, admet and physicochemical parameters. *Nat Rev*  
551 *Drug Discov.* 2011;10(3):197-208.

552

553 [22] Avdeef A. Absorption and drug development: solubility, permeability, and  
554 charge state. 2nd ed. Hoboken: John Wiley & Sons; 2012.

555

556 [23] Lipinski CA, Lombardo F, Dominy BW, Feeney PJ. Experimental and  
557 computational approaches to estimate solubility and permeability in drug  
558 discovery and development settings. *Adv Drug Deliv Rev.* 1997;46(1):3-26.

559

560 [24] Hadda TB, Ali MA, Vasand M, Gharby S, Fergoug T, Warad I. Tautomeric  
561 origin of dual effects of N1-nicotinoyl-3-(4'-hydroxy-3'-methyl phenyl)-5-  
562 [(sub)phenyl]-2-pyrazolines on bacterial and viral strains: POM analyses as new  
563 efficient bioinformatics' platform to predict and optimize bioactivity of drugs. *Med*  
564 *Chem Res.* 2013;22(3):1438-49.

565

566 [25] Kerns EH, Di L. Physicochemical properties. In: KERNS, E. H.; DI, L.  
567 Druglike properties: concepts, structure design and methods: from ADME to  
568 toxicity optimization. Amsterdam: Academic, 2008, p.35-99.

569

570 [26] Waring, M. J. Lipophilicity in drugs discovery. *Expert Opin Drug Discov.*  
571 2010;5(3):235-48.

572

573 [27] Gleeson MP. Generation of a set of simple, interpretable ADMET rules of  
574 thumb. *Eur J Med Chem.* 2008;51(4):817-34.

575

- 576 [28] Gurunga AB, Bhattacharjee A, Ali MA. Exploring the physicochemical  
577 profile and the binding patterns of selected novel anticancer himalayan plant  
578 derived active compounds with macromolecular targets. Inform Med Unlocked.  
579 2016;5:1-14.  
580
- 581 [29] Daina A, Michielin O, Zoete V. SwissADME: a free web tool to evaluate  
582 pharmacokinetics, druglikeness and medicinal chemistry friendliness of small  
583 molecules. Sci Rep. 2017;7:42717.  
584
- 585 [30] Khan T, Ahmad R, Azad I, Raza S, Joshi S, Khan AR. Computer-aided  
586 drug design and virtual screening of targeted combinatorial libraries of mixed-  
587 ligand transition metal complexes of 2-butanone thiosemicarbazone. Comput  
588 Biol Chem. 2018;75:178-95.  
589
- 590 [31] Akos Consulting & Solutions GmbH. MDDR. 2020 Abr 8 [cited 08 April  
591 2020]. In: Akos [Internet]. Available from:  
592 <http://www.akosgmbh.de/accelrys/databases/mddr.htm>> Acesso em: 8 abr de  
593 2020.  
594
- 595 [32] Sheridan RP, Shpungin J. Calculating similarities between biological  
596 activities in the MDL Drug Data Report database. J Chem Inf Model.  
597 2004;44(2):727-40.  
598
- 599 [33] Medeiros CIS, Figuêredo Silva D, Oliveira Filho AA, Oliveira Lima, E.  
600 Análise farmacológica e toxicológica de dois enantiômeros derivados do

- 601 monoterpeno citronelal: Uma abordagem in silico. Rev Bras Educ Med.  
602 2017;7(3):84-9.  
603
- 604 [34] Martin YC. A bioavailability score. J Med Chem. 2005;48(9):3164-70.  
605
- 606 [35] Baell JB, Holloway GA. New substructure filters for removal of pan assay  
607 interference compounds (PAINS) from screening libraries and for their exclusion  
608 in bioassays. J Med Chem. 2010;53(7):2719-40.  
609
- 610 [36] Brenk R, Schipani A, James D, Krasowski A, Gilbert IH, Frearson J, et al.  
611 Lessons learnt from assembling screening libraries for drug discovery for  
612 neglected diseases. Chem Med Chem. 2008;3(3):435-44.  
613
- 614 [37] Kovačević SZ, Jevrić LR, Kuzmanović SOP, Lončar ES. Prediction of In-  
615 silico ADME properties of 1,2-O-isopropylidene aldohexose derivatives. Iran J  
616 Pharm Res. 2014;13(3):899-907.  
617
- 618 [38] Santos RDC, Daniel IC, Próspero DFA, Da Costa CLS. Modificação  
619 molecular incremental: análise de parâmetros físico-químicos, farmacocinéticos  
620 e toxicológicos in silico de fármacos inibidores seletivos da recaptação de  
621 serotonina (ISRSs). Bol Infor Geum. 2018;9(2):31.  
622
- 623 [39] Potts RO, Guy RH. Predicting skin permeability. Pharm Res.  
624 1992;9(5):663-9.  
625

- 626 [40] Yamashita S, Furubayashi T, Kataoka M, Sakane T, Sezaki H, Tokuda H.  
627 Optimized conditions for prediction of intestinal drug permeability using Caco-2  
628 cells. *Eur J Pharm Biopharm.* 2000;10(3):195-204.  
629
- 630 [41] RODRIGUES, A. C. C. Identificação de Derivados Xantônicos como  
631 Potenciais Indutores/Ativadores da Glicoproteína-P. M. Sc. Thesis,  
632 Universidade do Porto, 2016. Available from: [https://repositorio-](https://repositorio-aberto.up.pt/handle/10216/87290)  
633 [aberto.up.pt/handle/10216/87290](https://repositorio-aberto.up.pt/handle/10216/87290)  
634
- 635 [42] Kraemer L, Lange ATG, Fachinetto JM. O uso da nanotecnologia para a  
636 condução de fármacos ao sistema nervoso central. In 6º Congresso  
637 Internacional em Saúde, 2019:6.  
638
- 639 [43] Kirchmair J, Göller AH, Lang D, Kunze J, Testa B, Wilson ID, et al.  
640 Predicting drug metabolism: experiment and/or computation? *Nat Rev Drug*  
641 *Discov.* 2015;14(6):387-404.  
642
- 643 [44] Ames BN, Gurney EG, Miller JA, Bartsch H. Carcinogens as frameshift  
644 mutagens: metabolites and derivatives of 2-acetylaminofluorene and other  
645 aromatic amine carcinogens. *Proc Natl Acad Sci.* 1972;69(11):3128–32.  
646
- 647 [45] Balakrishnan N, Raj JS, Kandakatla N. In silico studies on new indazole  
648 derivatives as gsk-3 $\beta$  inhibitors. *Int J Pharm Pharm Sci.* 2015;7(3):295-9.  
649
- 650 [46] Proudfoot JR. Drugs, leads, and drug-likeness: an analysis of some  
651 recently launched drugs. *Bioorg Med Chem Lett.* 2002;12(12):1647-50.



652

653 [47] Jarrahpour A, Motamedifar M, Zarei M, Youssoufi MH, Mimouni M, Chohan  
654 ZH, et al. Petra, Osiris, and Molinspiration together as a guide in drug design:  
655 predictions and correlation structure/antibacterial activity relationships of new n-  
656 sulfonyl monocyclic  $\beta$ -lactams. Phosphorus Sulfur Silicon Relat Elem.  
657 2010;185(2):1563-5325.

658

659 [48] Uddin N, Sirajuddin M, Uddin N, Tariq M, Ullah H, Ali S, et al. Synthesis,  
660 spectroscopic characterization, biological screenings, DNA binding study and  
661 POM analyses of transition metal carboxylates. Spectrochim Acta A Mol Biomol  
662 Spectrosc. 2015;5:563-74.

663

664 [49] Lagunin A, Zakharov A, Filimonov D, Poroikov V. QSAR modelling of rat  
665 acute toxicity on the basis of PASS prediction. Mol Inform. 2011;30(2-3):241-50.

666

667 [50] Mishra H, Singh N, Lahiri T, Misra K. A comparative study on the molecular  
668 descriptors for predicting drug-likeness of small molecules. Bioinf.  
669 2009;3(9):384-8.

670

671 [51] Silva KS, Botura MB, Santos Junior MC, Almeida RBM. Triagem virtual  
672 para identificação de inibidores da acetilcolinesterase. Anais Seminário de  
673 Iniciação Científica, 2017;21:1-4.

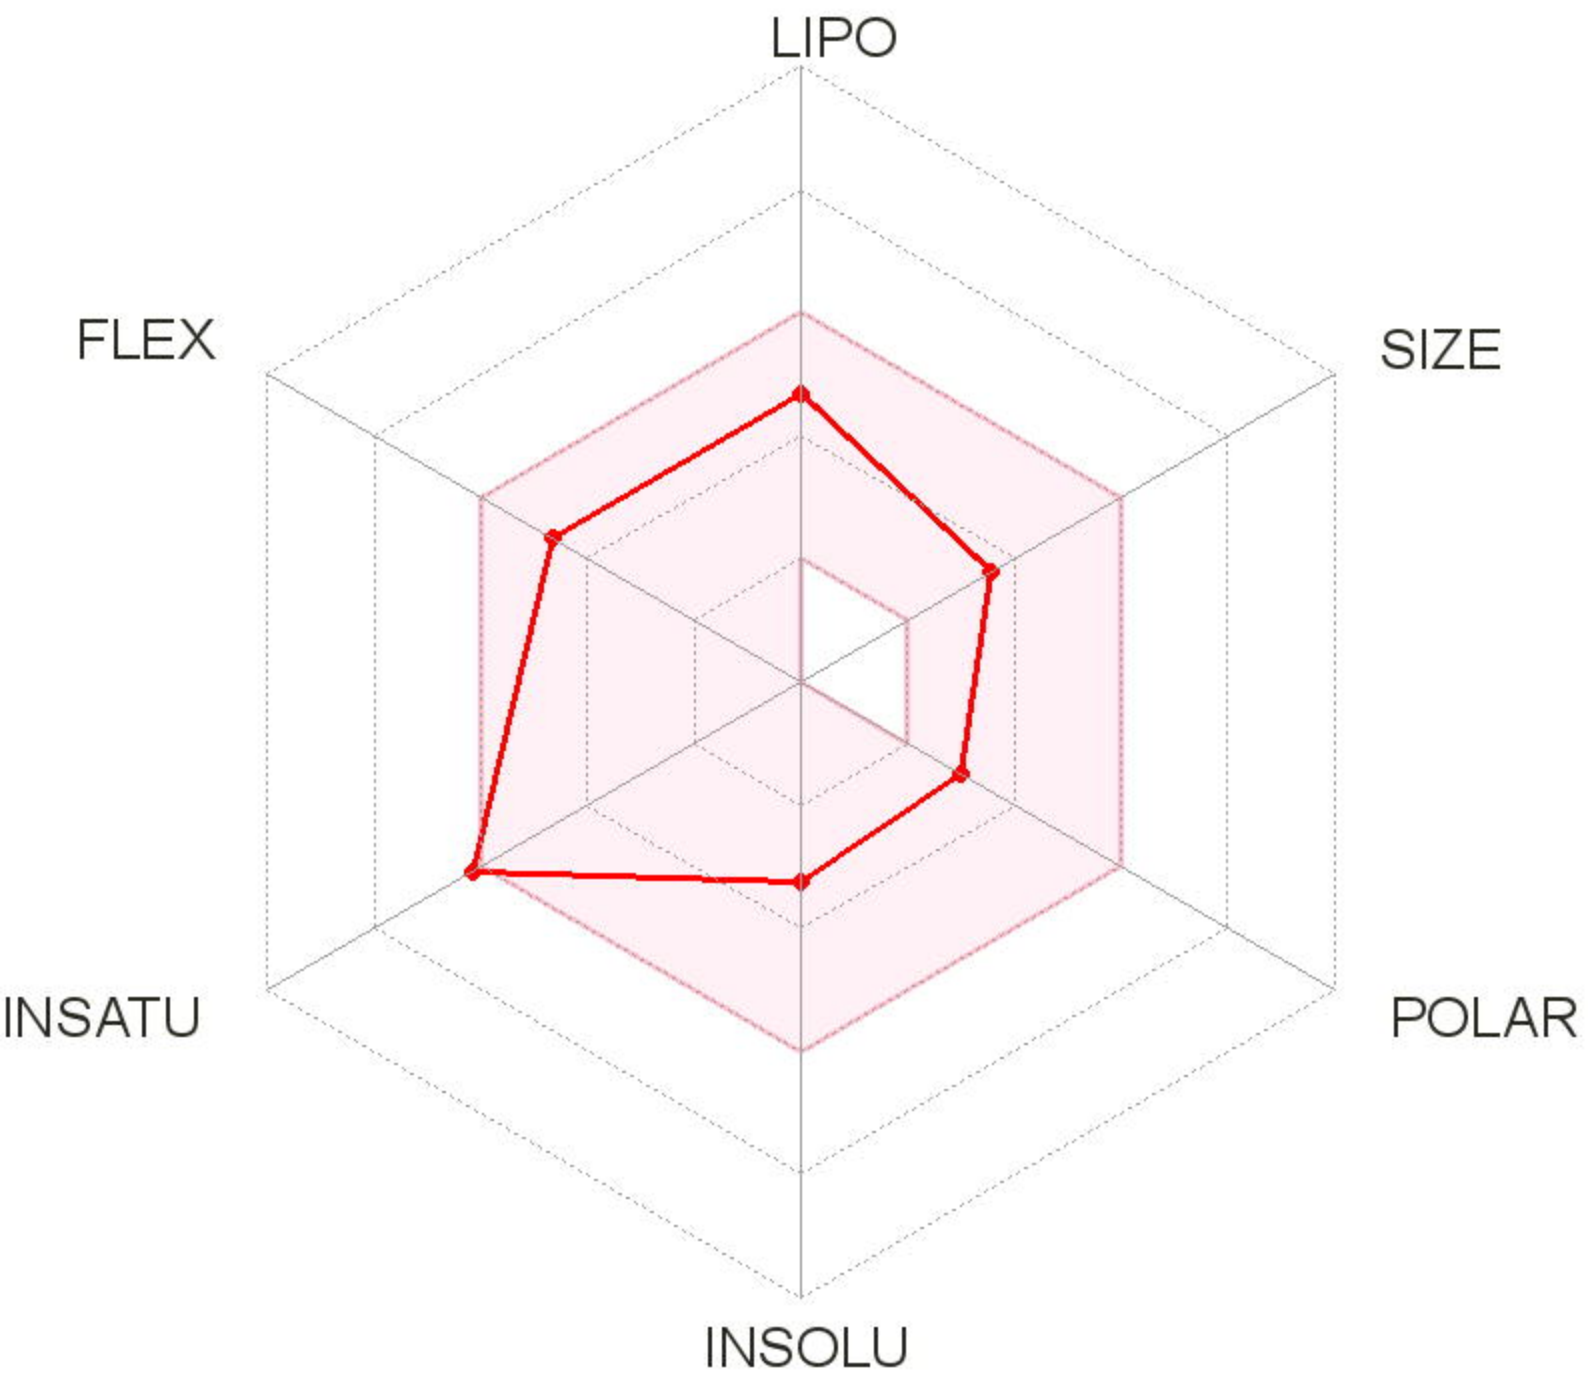

# Riparina B

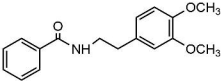

Source: http://biorxiv.org/content/10.1101/2020.04.24.059626v1.full.pdf
